# Supplementary material for: Engineered Promoters for Potent Transient Overexpression
Source: PubMed Central journal article supplement (PMC4752495; doi:10.1371/journal.pone.0148918), 2016-02-12
Supplement: pone.0148918.s001.pdf [file pone.0148918.s001.pdf]

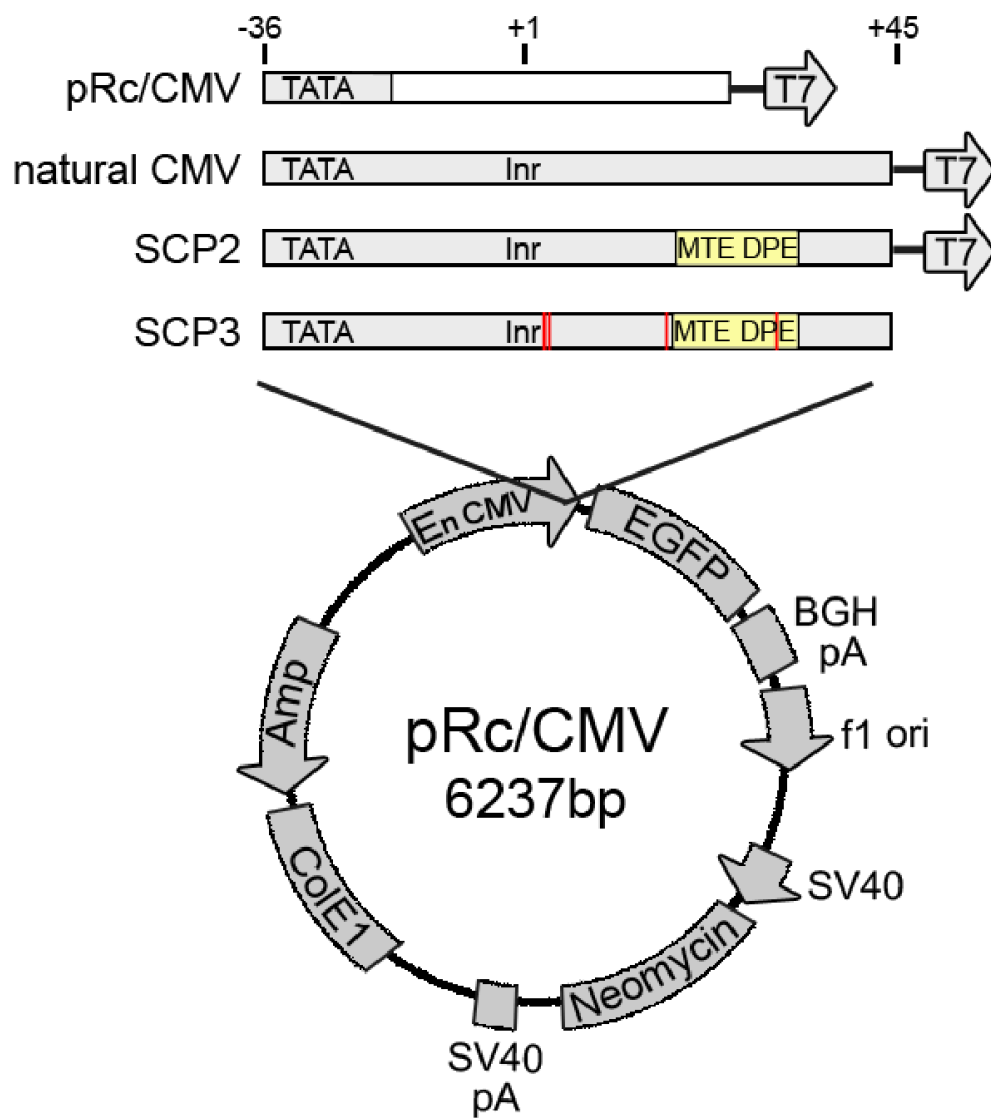

**S1 Fig. Schematic illustration of the constructed *EGFP* expression plasmids driven by the various core promoters linked to the CMV enhancer.**
