# Supplementary material for: Engineered Promoters for Potent Transient Overexpression
Source: PubMed Central journal article supplement (PMC4752495; doi:10.1371/journal.pone.0148918), 2016-02-12
Supplement: pone.0148918.s004.pdf [file pone.0148918.s004.pdf]

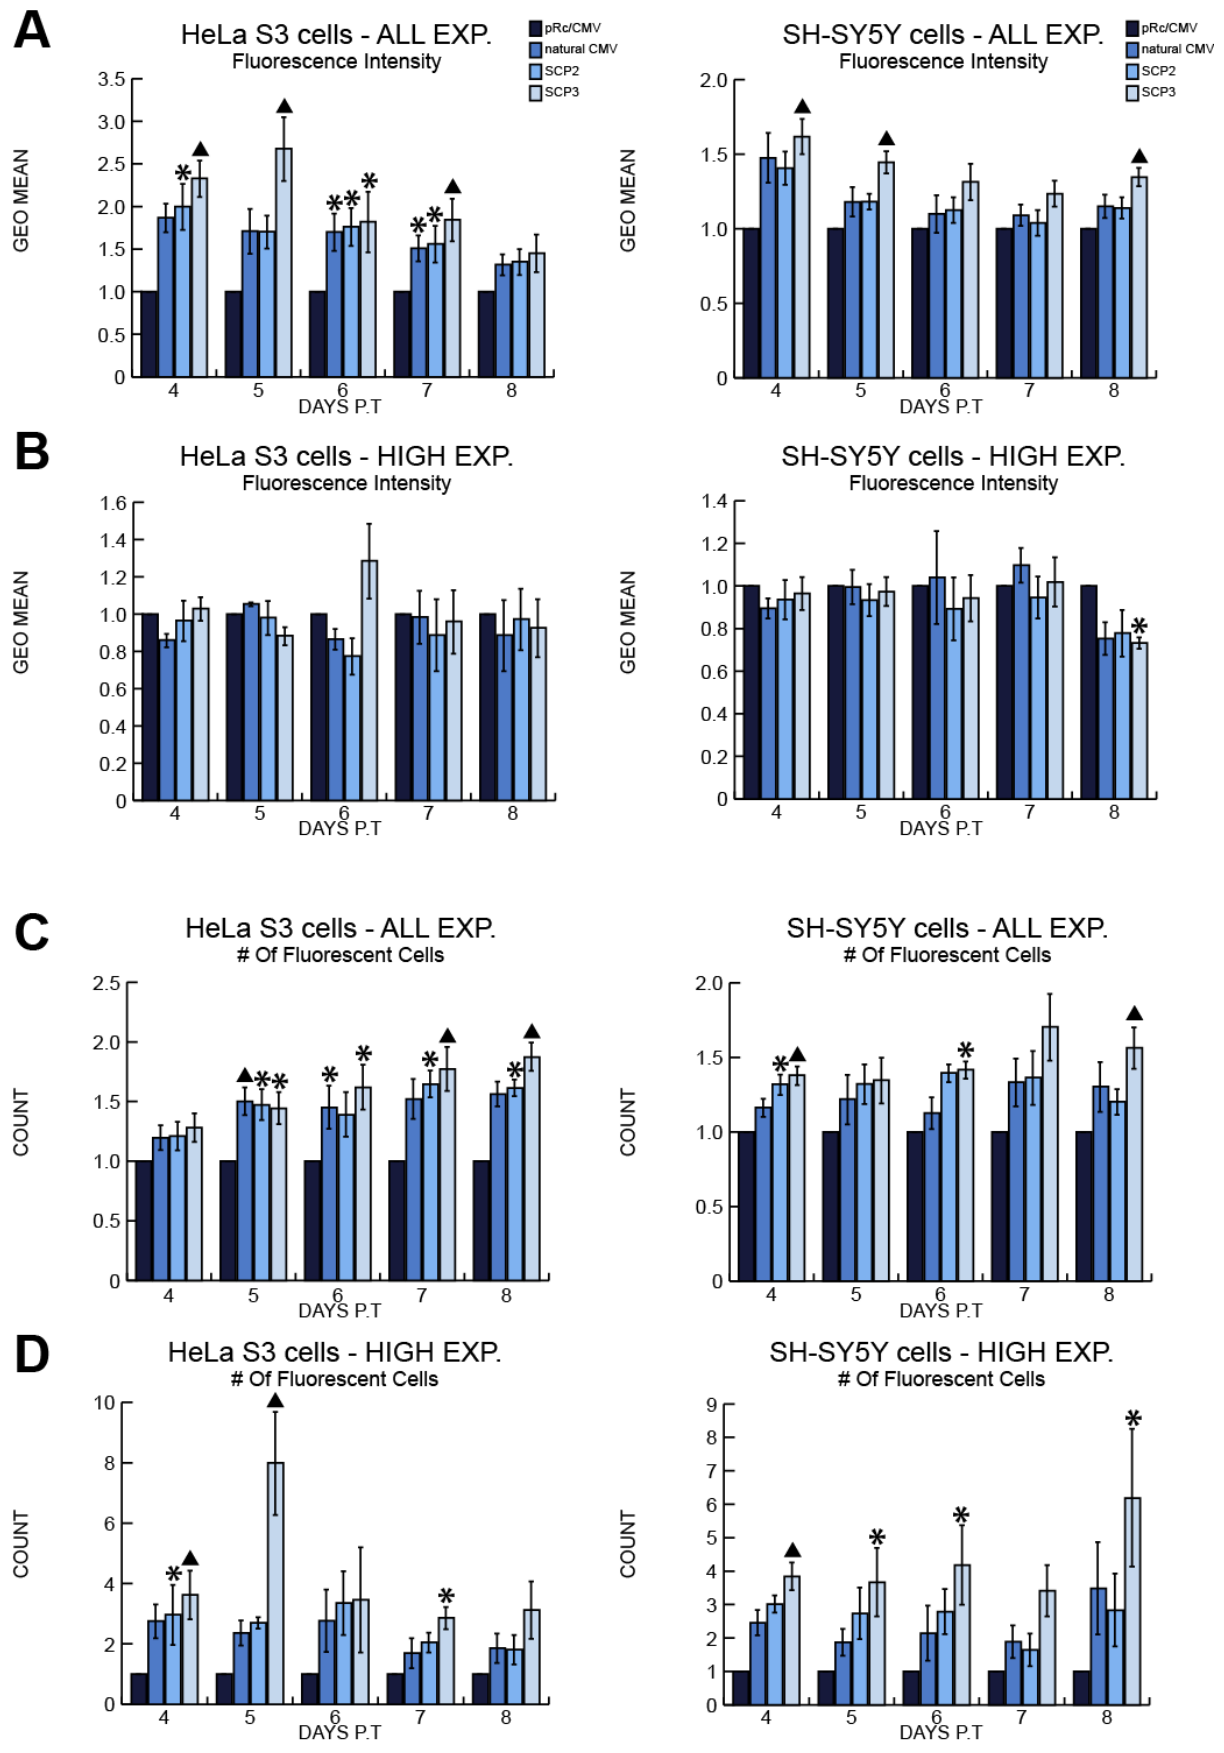

**S4 Fig. FACS analysis of long-term average fluorescence intensity and average number of fluorescent HeLa S3 and SH-SY5Y cells.**
