# Supplementary material for: Engineered Promoters for Potent Transient Overexpression
Source: PubMed Central journal article supplement (PMC4752495; doi:10.1371/journal.pone.0148918), 2016-02-12
Supplement: pone.0148918.s005.pdf [file pone.0148918.s005.pdf]

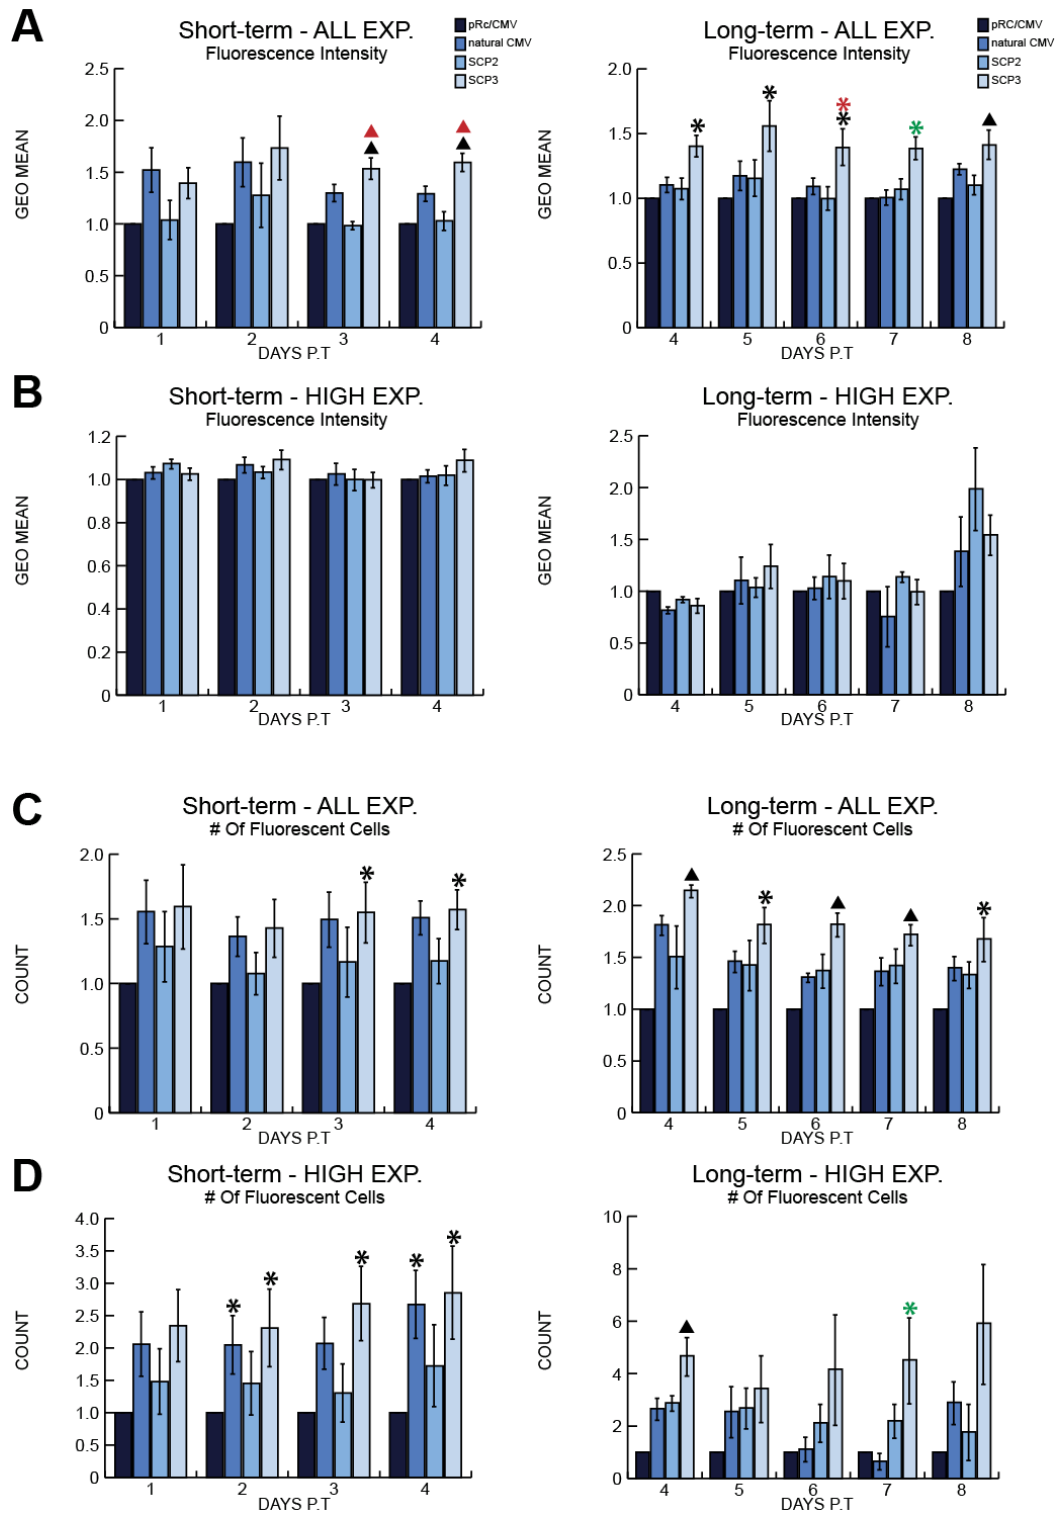

**S5 Fig. FACS analysis of short and long-term average fluorescence intensity and average number of fluorescent HOP-92 cells.**
